# Supplementary material for: Hierarchical Structure of the Cocos nucifera (Coconut) Endocarp: Functional Morphology and its Influence on Fracture Toughness
Source: MDPI journal article supplement (doi:10.3390/molecules25010223), 2020-01-06
Supplement: s1 [file s1]

# Hierarchical structure of the *Cocos nucifera* (coconut) endocarp: Morphology and its influence on fracture toughness

Stefanie Schmier, Naoe Hosoda, Thomas Speck

## Supplementary information 2

### Raw data of the morphological parameters of the different hierarchical levels of the coconut endocarp

#### H2-Endocarp

| no.endocarp | l1.mm | w1.mm | w2.mm | w3.mm | t.thick1.mm | t.thick2.mm | t.thick3.mm | t.thin1.mm | t.thin2.mm | t.thin3.mm |
|-------------|-------|-------|-------|-------|-------------|-------------|-------------|------------|------------|------------|
| C1          | 102.1 | 92.0  | 91.2  | 95.0  | 5.24        | 5.36        | 5.31        | 1.76       | 2.19       | 1.78       |
| C2          | 114.6 | 88.9  | 86.3  | 85.0  | 4.53        | 4.18        | 4.27        | 2.53       | 2.67       | 2.57       |
| C3          | 122.0 | 87.4  | 88.5  | 82.4  | 3.97        | 3.77        | 3.75        | 2.17       | 1.95       | 2.07       |
| C4          | 104.0 | 100.5 | 100.8 | 101.0 | 3.83        | 3.93        | 4.02        | 2.20       | 1.91       | 2.27       |
| C5          | 126.8 | 96.8  | 94.3  | 94.5  | 4.00        | 4.28        | 3.97        | 2.19       | 2.05       | 2.01       |
| C6          | 123.0 | 93.0  | 89.5  | 88.3  | 4.95        | 5.02        | 5.04        | 2.71       | 2.67       | 2.45       |
| C7          | 106.1 | 89.5  | 90.0  | 88.8  | 4.46        | 4.43        | 4.30        | 3.81       | 3.63       | 3.41       |
| C8          | 123.6 | 101.0 | 101.3 | 99.6  | 5.17        | 5.07        | 5.19        | 2.93       | 2.58       | 2.88       |
| C9          | 119.8 | 91.4  | 90.3  | 90.6  | 5.34        | 5.42        | 5.09        | 2.59       | 2.64       | 2.74       |
| C10         | 122.7 | 96.3  | 95.0  | 95.1  | 5.36        | 5.16        | 5.41        | 2.85       | 2.78       | 2.87       |

Abbreviations: l: endocarp length [mm]; w: endocarp width [mm]; t.thick: thickness thickest region of the cut surface [mm]; t.thin: thickness thinnest region of the cut surface [mm]

#### H3

#### Morphometry results of CT Analyser V.1.18.4.0 (Bruker microCT, Belgium)

|                                                      |                                |
|------------------------------------------------------|--------------------------------|
| Number of layers:                                    | 860                            |
| Lower vertical position:                             | 4.1999E-002 [mm]               |
| Upper vertical position:                             | 3.6119E+001 [mm]               |
| Pixel size:                                          | 4.1999E+001 [um]               |
| Total VOI volume:                                    | 5.5667E+003 [mm <sup>3</sup> ] |
| Object volume:                                       | 5.3810E+003 [mm <sup>3</sup> ] |
| Total porosity:                                      | 3.3352E+000[%]                 |
| Diameter of vascular bundles (Structure separation): | 2.1516E-001 [mm]               |
| Standard deviation:                                  | 1.4118E-001 [mm]               |

#### Diameter of vascular bundles distribution:

| Range<br>mm                | Volume<br>mm <sup>3</sup> | Percent volume in range<br>% |
|----------------------------|---------------------------|------------------------------|
| 4.1999E-002 - <1.2600E-001 | 5.3293E+001               | 27.9                         |
| 1.2600E-001 - <2.1000E-001 | 6.9055E+001               | 36.1                         |
| 2.1000E-001 - <2.9399E-001 | 2.5818E+001               | 13.5                         |
| 2.9399E-001 - <3.7799E-001 | 1.9636E+001               | 10.3                         |
| 3.7799E-001 - <4.6199E-001 | 1.2212E+001               | 6.4                          |
| 4.6199E-001 - <5.4599E-001 | 4.6235E+000               | 2.4                          |
| 5.4599E-001 - <6.2999E-001 | 3.3313E+000               | 1.7                          |
| 6.2999E-001 - <7.1399E-001 | 8.9930E-001               | 0.5                          |
| 7.1399E-001 - <7.9798E-001 | 1.0307E+000               | 0.5                          |
| 7.9798E-001 - <8.8198E-001 | 9.8813E-001               | 0.5                          |
| 8.8198E-001 - <9.6598E-001 | 3.6612E-001               | 0.2                          |

#### H4-1

| no.endocarp | position      | l.complete | l.um  | w.um | no.endocarp | position      | l.complete | l.um  | w.um |
|-------------|---------------|------------|-------|------|-------------|---------------|------------|-------|------|
| C1          | mesocarp side | no         | 181.9 | 14.4 | C8          | testa side    | yes        | 627.2 | 10.4 |
| C1          | mesocarp side | yes        | 869.2 | 15.0 | C8          | testa side    | no         | 144.7 | 9.5  |
| C1          | mesocarp side | yes        | 274.8 | 10.6 | C8          | testa side    | no         | 302.5 | 10.4 |
| C1          | mesocarp side | no         | 248.3 | 18.1 | C8          | testa side    | no         | 185.9 | 11.9 |
| C1          | mesocarp side | no         | 212.0 | 10.5 | C8          | testa side    | no         | 83.4  | 5.7  |
| C1          | mesocarp side | no         | 226.5 | 10.5 | C8          | testa side    | no         | 194.2 | 12.4 |
| C1          | mesocarp side | no         | 170.1 | 11.1 | C8          | testa side    | no         | 239.7 | 8.9  |
| C1          | mesocarp side | no         | 186.9 | 9.6  | C8          | testa side    | no         | 87.1  | 6.5  |
| C1          | mesocarp side | no         | 293.2 | 13.3 | C10         | mesocarp side | yes        | 220.1 | 11.3 |
| C1          | centre        | no         | 423.0 | 13.1 | C10         | mesocarp side | no         | 169.0 | 14.6 |
| C1          | centre        | no         | 316.5 | 10.1 | C10         | mesocarp side | no         | 197.6 | 10.6 |
| C1          | centre        | no         | 193.1 | 16.1 | C10         | mesocarp side | no         | 314.9 | 12.9 |
| C1          | centre        | no         | 424.6 | 11.3 | C10         | mesocarp side | no         | 358.3 | 12.7 |
| C1          | centre        | no         | 349.4 | 12.8 | C10         | mesocarp side | no         | 327.8 | 8.9  |
| C1          | centre        | no         | 285.3 | 15.3 | C10         | mesocarp side | no         | 303.5 | 9.2  |
| C1          | centre        | no         | 295.9 | 11.3 | C10         | mesocarp side | no         | 356.2 | 12.6 |
| C1          | centre        | no         | 273.1 | 8.7  | C10         | mesocarp side | no         | 570.5 | 9.6  |
| C1          | centre        | no         | 208.9 | 8.1  | C10         | mesocarp side | no         | 553.6 | 8.9  |
| C1          | centre        | no         | 144.7 | 14.1 | C10         | centre        | no         | 156.6 | 12.4 |
| C1          | testa side    | no         | 401.8 | 7.5  | C10         | centre        | no         | 96.1  | 8.2  |
| C1          | testa side    | no         | 601.0 | 9.5  | C10         | centre        | no         | 321.5 | 15.2 |
| C1          | testa side    | no         | 419.6 | 12.0 | C10         | centre        | no         | 245.5 | 12.3 |
| C1          | testa side    | no         | 177.2 | 9.0  | C10         | centre        | no         | 346.9 | 12.4 |
| C1          | testa side    | no         | 347.0 | 11.7 | C10         | centre        | no         | 319.8 | 11.1 |
| C1          | testa side    | yes        | 290.1 | 11.1 | C10         | centre        | no         | 193.1 | 11.9 |
| C1          | testa side    | no         | 580.9 | 14.4 | C10         | centre        | no         | 214.7 | 12.2 |
| C1          | testa side    | no         | 619.4 | 19.5 | C10         | centre        | no         | 89.3  | 10.8 |
| C1          | testa side    | no         | 320.5 | 12.0 | C10         | testa side    | no         | 111.6 | 8.1  |
| C1          | testa side    | no         | 340.3 | 14.9 | C10         | testa side    | no         | 158.1 | 8.6  |
| C8          | mesocarp side | no         | 605.6 | 22.6 | C10         | testa side    | no         | 189.2 | 7.0  |
| C8          | mesocarp side | no         | 259.3 | 12.0 | C10         | testa side    | no         | 268.9 | 8.9  |
| C8          | mesocarp side | no         | 587.5 | 23.6 | C10         | testa side    | no         | 155.4 | 5.8  |
| C8          | mesocarp side | no         | 548.3 | 24.5 | C10         | testa side    | no         | 309.3 | 6.5  |
| C8          | centre        | no         | 82.7  | 10.0 | C10         | testa side    | no         | 250.8 | 7.4  |
| C8          | centre        | no         | 269.9 | 10.6 | C10         | testa side    | no         | 343.1 | 6.4  |
| C8          | centre        | no         | 420.4 | 13.7 | C10         | testa side    | no         | 316.6 | 10.4 |
| C8          | centre        | no         | 237.8 | 11.0 | C10         | testa side    | no         | 352.9 | 7.8  |
| C8          | centre        | no         | 400.9 | 13.5 |             |               |            |       |      |
| C8          | centre        | no         | 143.0 | 8.0  |             |               |            |       |      |
| C8          | centre        | no         | 159.2 | 13.4 |             |               |            |       |      |
| C8          | centre        | no         | 181.2 | 13.0 |             |               |            |       |      |
| C8          | centre        | no         | 226.1 | 9.7  |             |               |            |       |      |
| C8          | centre        | yes        | 264.3 | 11.9 |             |               |            |       |      |

Abbreviations: l.complete: tracheid length intact, l.um: tracheid length [ $\mu\text{m}$ ]; w.um: tracheid width [ $\mu\text{m}$ ]

## H4-2

| no.endocarp | position      | l.um  | w.um | no.endocarp | position      | l.um  | w.um |
|-------------|---------------|-------|------|-------------|---------------|-------|------|
| C1          | mesocarp side | 89.1  | 48.1 | C1          | testa side    | 239.8 | 25.0 |
| C1          | mesocarp side | 119.3 | 33.1 | C1          | testa side    | 104.1 | 27.8 |
| C1          | mesocarp side | 107.7 | 52.9 | C1          | testa side    | 78.3  | 27.0 |
| C1          | mesocarp side | 117.7 | 39.7 | C1          | testa side    | 106.5 | 26.3 |
| C1          | mesocarp side | 98.9  | 30.2 | C1          | testa side    | 131.2 | 28.4 |
| C1          | mesocarp side | 70.9  | 31.8 | C1          | testa side    | 89.6  | 24.7 |
| C1          | mesocarp side | 89.8  | 36.0 | C1          | testa side    | 167.7 | 15.9 |
| C1          | mesocarp side | 85.3  | 36.3 | C1          | testa side    | 181.2 | 24.1 |
| C1          | mesocarp side | 89.1  | 47.9 | C1          | testa side    | 158.1 | 23.7 |
| C1          | mesocarp side | 123.5 | 45.5 | C1          | testa side    | 170.4 | 24.1 |
| C1          | mesocarp side | 116.2 | 43.6 | C1          | testa side    | 75.1  | 26.8 |
| C1          | mesocarp side | 120.9 | 36.6 | C1          | testa side    | 159.3 | 18.2 |
| C1          | mesocarp side | 95.7  | 47.0 | C8          | mesocarp side | 134.7 | 58.3 |
| C1          | mesocarp side | 76.8  | 28.0 | C8          | mesocarp side | 124.0 | 39.7 |
| C1          | mesocarp side | 76.4  | 24.6 | C8          | mesocarp side | 105.0 | 55.6 |
| C1          | mesocarp side | 115.6 | 48.4 | C8          | mesocarp side | 140.6 | 38.8 |
| C1          | mesocarp side | 91.6  | 31.5 | C8          | mesocarp side | 136.0 | 37.5 |
| C1          | mesocarp side | 75.4  | 41.7 | C8          | mesocarp side | 130.6 | 58.1 |
| C1          | mesocarp side | 94.6  | 37.3 | C8          | mesocarp side | 97.5  | 31.6 |
| C1          | mesocarp side | 82.0  | 29.1 | C8          | mesocarp side | 124.1 | 64.4 |
| C1          | centre        | 143.6 | 29.5 | C8          | mesocarp side | 72.5  | 31.9 |
| C1          | centre        | 124.8 | 32.1 | C8          | mesocarp side | 76.6  | 41.9 |
| C1          | centre        | 79.9  | 35.8 | C8          | mesocarp side | 130.4 | 32.0 |
| C1          | centre        | 139.9 | 18.3 | C8          | mesocarp side | 100.9 | 42.8 |
| C1          | centre        | 112.1 | 24.3 | C8          | mesocarp side | 90.8  | 48.3 |
| C1          | centre        | 117.7 | 30.8 | C8          | mesocarp side | 141.4 | 45.9 |
| C1          | centre        | 75.8  | 22.4 | C8          | mesocarp side | 75.9  | 26.2 |
| C1          | centre        | 127.0 | 39.4 | C8          | mesocarp side | 113.6 | 61.1 |
| C1          | centre        | 127.1 | 28.4 | C8          | mesocarp side | 109.4 | 43.9 |
| C1          | centre        | 82.8  | 28.8 | C8          | mesocarp side | 74.6  | 37.5 |
| C1          | centre        | 143.5 | 33.3 | C8          | mesocarp side | 108.4 | 48.1 |
| C1          | centre        | 162.1 | 33.5 | C8          | mesocarp side | 129.5 | 45.9 |
| C1          | centre        | 126.2 | 26.1 | C8          | centre        | 119.6 | 33.0 |
| C1          | centre        | 114.2 | 40.6 | C8          | centre        | 126.2 | 52.2 |
| C1          | centre        | 133.8 | 25.5 | C8          | centre        | 91.8  | 36.5 |
| C1          | centre        | 145.8 | 32.8 | C8          | centre        | 97.5  | 32.1 |
| C1          | centre        | 87.7  | 19.8 | C8          | centre        | 130.1 | 27.9 |
| C1          | centre        | 79.7  | 34.7 | C8          | centre        | 172.7 | 21.7 |
| C1          | centre        | 74.0  | 27.0 | C8          | centre        | 168.4 | 40.7 |
| C1          | centre        | 176.5 | 43.6 | C8          | centre        | 99.9  | 40.2 |
| C1          | testa side    | 226.7 | 22.8 | C8          | centre        | 117.3 | 44.5 |
| C1          | testa side    | 172.5 | 20.2 | C8          | centre        | 135.9 | 31.9 |
| C1          | testa side    | 119.2 | 37.7 | C8          | centre        | 176.1 | 24.0 |
| C1          | testa side    | 110.3 | 22.3 | C8          | centre        | 137.3 | 28.5 |
| C1          | testa side    | 119.7 | 29.6 | C8          | centre        | 77.2  | 23.6 |
| C1          | testa side    | 201.5 | 38.1 | C8          | centre        | 93.5  | 33.1 |
| C1          | testa side    | 154.0 | 30.2 | C8          | centre        | 81.7  | 24.1 |
| C1          | testa side    | 154.2 | 22.4 | C8          | centre        | 88.7  | 34.5 |

| no.endocarp | position      | l.um  | w.um | no.endocarp | position   | l.um  | w.um |
|-------------|---------------|-------|------|-------------|------------|-------|------|
| C8          | centre        | 144.0 | 33.1 | C10         | centre     | 106.9 | 32.4 |
| C8          | centre        | 133.8 | 32.0 | C10         | centre     | 78.0  | 33.5 |
| C8          | centre        | 141.7 | 32.3 | C10         | centre     | 78.8  | 25.4 |
| C8          | centre        | 111.5 | 28.6 | C10         | centre     | 152.8 | 24.5 |
| C8          | testa side    | 72.1  | 25.9 | C10         | centre     | 108.7 | 33.5 |
| C8          | testa side    | 130.5 | 26.9 | C10         | centre     | 100.2 | 43.5 |
| C8          | testa side    | 161.2 | 20.9 | C10         | centre     | 129.3 | 30.8 |
| C8          | testa side    | 116.9 | 28.2 | C10         | centre     | 71.6  | 26.6 |
| C8          | testa side    | 171.5 | 26.6 | C10         | centre     | 157.5 | 29.1 |
| C8          | testa side    | 154.7 | 22.9 | C10         | centre     | 87.3  | 24.5 |
| C8          | testa side    | 83.5  | 22.6 | C10         | centre     | 104.6 | 34.7 |
| C8          | testa side    | 113.1 | 32.3 | C10         | centre     | 73.5  | 37.9 |
| C8          | testa side    | 100.7 | 29.8 | C10         | centre     | 102.7 | 27.0 |
| C8          | testa side    | 49.1  | 20.8 | C10         | centre     | 98.5  | 30.7 |
| C8          | testa side    | 91.0  | 21.2 | C10         | centre     | 147.3 | 29.8 |
| C8          | testa side    | 157.9 | 19.6 | C10         | centre     | 149.3 | 27.5 |
| C8          | testa side    | 138.8 | 14.4 | C10         | centre     | 102.6 | 29.0 |
| C8          | testa side    | 107.6 | 22.5 | C10         | centre     | 89.2  | 37.6 |
| C8          | testa side    | 85.1  | 16.3 | C10         | centre     | 91.7  | 22.5 |
| C8          | testa side    | 124.7 | 19.1 | C10         | centre     | 90.1  | 34.2 |
| C8          | testa side    | 101.6 | 25.1 | C10         | testa side | 120.0 | 22.9 |
| C8          | testa side    | 134.8 | 28.0 | C10         | testa side | 163.0 | 24.9 |
| C8          | testa side    | 124.6 | 19.2 | C10         | testa side | 80.3  | 21.3 |
| C8          | testa side    | 62.9  | 27.5 | C10         | testa side | 81.8  | 29.8 |
| C10         | mesocarp side | 100.0 | 61.1 | C10         | testa side | 148.1 | 20.6 |
| C10         | mesocarp side | 135.8 | 36.1 | C10         | testa side | 152.0 | 21.4 |
| C10         | mesocarp side | 97.7  | 39.9 | C10         | testa side | 112.2 | 24.0 |
| C10         | mesocarp side | 77.8  | 39.4 | C10         | testa side | 133.3 | 38.4 |
| C10         | mesocarp side | 100.1 | 48.5 | C10         | testa side | 93.2  | 22.3 |
| C10         | mesocarp side | 99.4  | 38.3 | C10         | testa side | 83.7  | 27.8 |
| C10         | mesocarp side | 116.6 | 36.6 | C10         | testa side | 92.9  | 25.6 |
| C10         | mesocarp side | 69.7  | 27.8 | C10         | testa side | 95.2  | 34.0 |
| C10         | mesocarp side | 114.6 | 31.7 | C10         | testa side | 117.5 | 30.3 |
| C10         | mesocarp side | 70.7  | 37.8 | C10         | testa side | 119.2 | 21.4 |
| C10         | mesocarp side | 95.9  | 33.8 | C10         | testa side | 93.4  | 34.1 |
| C10         | mesocarp side | 63.6  | 36.7 | C10         | testa side | 133.8 | 37.2 |
| C10         | mesocarp side | 66.2  | 41.3 | C10         | testa side | 126.6 | 29.7 |
| C10         | mesocarp side | 81.9  | 48.0 | C10         | testa side | 157.6 | 23.4 |
| C10         | mesocarp side | 101.8 | 32.7 | C10         | testa side | 103.7 | 20.4 |
| C10         | mesocarp side | 105.3 | 45.8 | C10         | testa side | 101.6 | 26.6 |
| C10         | mesocarp side | 70.1  | 35.0 |             |            |       |      |
| C10         | mesocarp side | 73.1  | 42.0 |             |            |       |      |
| C10         | mesocarp side | 113.9 | 43.0 |             |            |       |      |
| C10         | mesocarp side | 110.8 | 26.6 |             |            |       |      |

Abbreviations: l.um: sclereid length [ $\mu\text{m}$ ]; w.um: sclereid width [ $\mu\text{m}$ ]

## H5-1

| no.endocarp | t1.um | t2.um | t3.um | r1.um | r2.um | r3.um | no.endocarp | t1.um | t2.um | t3.um | r1.um | r2.um | r3.um |
|-------------|-------|-------|-------|-------|-------|-------|-------------|-------|-------|-------|-------|-------|-------|
| C1          | 1.1   | 0.9   | 1.1   | 4.2   | 4.1   | 4.8   | C8          | 1.4   | 2.2   | 1.5   | 5.0   | 5.5   | 4.8   |
| C1          | 1.0   | 1.3   | 1.2   | 2.7   | 3.2   | 3.4   | C8          | 2.2   | 2.6   | 1.4   | 7.9   | 7.9   | 7.3   |
| C1          | 1.7   | 1.7   | 1.5   | 4.5   | 4.5   | 4.2   | C8          | 1.8   | 1.7   | 1.9   | 9.5   | 8.7   | 10.5  |
| C1          | 1.9   | 1.9   | 2.0   | 6.0   | 6.0   | 6.2   | C8          | 1.3   | 1.6   | 2.2   | 3.9   | 5.4   | 5.7   |
| C1          | 1.1   | 1.1   | 1.2   | 4.4   | 3.8   | 4.1   | C8          | 1.9   | 2.3   | 2.0   | 6.9   | 8.4   | 7.8   |
| C1          | 1.7   | 1.3   | 1.7   | 4.8   | 3.6   | 4.2   | C10         | 1.5   | 3.6   | 2.1   | 3.7   | 8.0   | 5.2   |
| C1          | 2.2   | 2.2   | 2.5   | 7.0   | 7.0   | 7.1   | C10         | 2.2   | 1.3   | 1.0   | 9.3   | 6.8   | 5.0   |
| C1          | 1.9   | 1.3   | 1.9   | 5.9   | 4.1   | 5.4   | C10         | 2.0   | 1.9   | 4.0   | 5.7   | 4.9   | 9.8   |
| C1          | 2.6   | 3.4   | 2.5   | 9.2   | 9.7   | 7.5   | C10         | 1.5   | 1.5   | 1.1   | 6.4   | 5.7   | 4.6   |
| C1          | 1.5   | 1.9   | 2.5   | 6.1   | 5.7   | 6.8   | C10         | 1.6   | 1.1   | 2.1   | 4.6   | 2.7   | 7.8   |
| C8          | 2.0   | 1.7   | 2.4   | 7.1   | 5.5   | 7.7   | C10         | 1.4   | 1.1   | 1.3   | 5.5   | 5.2   | 5.3   |
| C8          | 1.6   | 2.0   | 2.3   | 5.2   | 5.4   | 6.8   | C10         | 1.4   | 1.9   | 1.7   | 4.9   | 7.2   | 8.6   |
| C8          | 1.3   | 1.2   | 1.3   | 4.3   | 3.9   | 4.4   | C10         | 1.2   | 1.2   | 1.0   | 5.3   | 5.1   | 5.9   |
| C8          | 1.2   | 1.7   | 1.3   | 3.5   | 4.8   | 4.5   | C10         | 1.4   | 1.7   | 1.2   | 4.7   | 6.2   | 4.5   |
| C8          | 2.0   | 1.8   | 1.4   | 5.7   | 7.0   | 5.5   | C10         | 1.4   | 1.2   | 1.4   | 5.4   | 4.7   | 5.1   |

Abbreviations: t: thickness tracheid cell wall [μm]; r: radius tracheid [μm]

## H5-2

| no.endocarp | no.cell | t1.um | t2.um | t3.um | r1.um | r2.um | r3.um |
|-------------|---------|-------|-------|-------|-------|-------|-------|
| C1          | S1      | 11.1  | 11.7  | 10.1  | 11.8  | 13.0  | 11.0  |
| C1          | S2      | 11.4  | 12.5  | 14.1  | 12.7  | 14.1  | 15.9  |
| C1          | S3      | 17.0  | 13.5  | 13.9  | 18.7  | 15.5  | 16.0  |
| C1          | S4      | 13.1  | 15.5  | 12.7  | 15.1  | 18.0  | 14.9  |
| C1          | S5      | 13.1  | 15.5  | 15.3  | 14.8  | 16.9  | 16.8  |
| C1          | S6      | 13.5  | 13.9  | 13.3  | 14.6  | 15.1  | 14.1  |
| C1          | S7      | 16.6  | 14.3  | 13.3  | 17.3  | 15.1  | 13.9  |
| C1          | S8      | 13.2  | 10.1  | 14.1  | 14.9  | 11.6  | 16.8  |
| C1          | S9      | 10.7  | 11.0  | 9.5   | 12.1  | 13.8  | 10.5  |
| C1          | S10     | 20.1  | 17.7  | 18.9  | 24.4  | 18.5  | 23.9  |
| C8          | S1      | 17.5  | 13.9  | 12.7  | 18.4  | 14.9  | 13.4  |
| C8          | S2      | 11.3  | 14.5  | 16.5  | 12.0  | 15.5  | 17.4  |
| C8          | S3      | 18.1  | 14.0  | 17.9  | 21.1  | 17.3  | 22.3  |
| C8          | S4      | 16.5  | 19.0  | 19.8  | 17.1  | 20.5  | 21.0  |
| C8          | S5      | 15.8  | 13.1  | 15.6  | 18.3  | 14.6  | 18.0  |
| C8          | S6      | 16.9  | 25.7  | 22.0  | 18.7  | 28.8  | 27.8  |
| C8          | S7      | 12.2  | 8.6   | 10.2  | 12.8  | 9.6   | 11.0  |
| C8          | S8      | 8.9   | 8.9   | 8.0   | 10.4  | 10.3  | 9.8   |
| C8          | S9      | 10.5  | 17.3  | 10.2  | 12.6  | 20.6  | 12.7  |
| C8          | S10     | 6.3   | 13.2  | 10.8  | 7.1   | 18.2  | 12.2  |
| C10         | S1      | 12.8  | 12.2  | 11.6  | 15.5  | 14.8  | 14.3  |
| C10         | S2      | 15.7  | 13.7  | 13.7  | 17.6  | 15.6  | 15.8  |
| C10         | S3      | 16.4  | 14.2  | 18.7  | 17.2  | 14.9  | 19.1  |
| C10         | S4      | 15.7  | 12.8  | 14.3  | 17.2  | 14.5  | 17.4  |
| C10         | S5      | 13.2  | 12.9  | 11.1  | 14.4  | 14.4  | 12.3  |
| C10         | S6      | 9.5   | 13.8  | 11.8  | 9.9   | 14.6  | 12.5  |
| C10         | S7      | 11.8  | 13.4  | 14.2  | 12.2  | 14.0  | 14.9  |
| C10         | S8      | 10.6  | 9.8   | 10.9  | 13.0  | 10.9  | 12.2  |
| C10         | S9      | 13.1  | 12.8  | 13.0  | 14.5  | 14.3  | 14.7  |
| C10         | S10     | 16.9  | 23.0  | 13.4  | 18.0  | 26.8  | 14.5  |

Abbreviations: no.cell: ; t: thickness sclereid cell wall [μm]; r: radius sclereid [μm]

**H6-2****Primary cell wall layer (11)**

| no.endocarp | no.cell | t.um | no.endocarp | no.cell | t.um | no.endocarp | no.cell | t.um |
|-------------|---------|------|-------------|---------|------|-------------|---------|------|
| C1          | S1      | 2.55 | C8          | S1      | 2.23 | C10         | S1      | 2.48 |
| C1          | S2      | NA   | C8          | S2      | 1.88 | C10         | S2      | 1.88 |
| C1          | S3      | 2.34 | C8          | S3      | 2.06 | C10         | S3      | 1.43 |
| C1          | S4      | 1.75 | C8          | S4      | 1.55 | C10         | S4      | 2.30 |
| C1          | S5      | 1.70 | C8          | S5      | 1.10 | C10         | S5      | 2.74 |
| C1          | S6      | NA   | C8          | S6      | NA   | C10         | S6      | 1.57 |
| C1          | S7      | 2.09 | C8          | S7      | NA   | C10         | S7      | NA   |
| C1          | S8      | 2.31 | C8          | S8      | 2.16 | C10         | S8      | 1.86 |
| C1          | S9      | 1.51 | C8          | S9      | 1.22 | C10         | S9      | NA   |
| C1          | S10     | 3.17 | C8          | S10     | 2.40 | C10         | S10     | 2.65 |

**Secondary cell wall layers (12)**

| no.endocarp | no.cell | t.um |
|-------------|---------|------|-------------|---------|------|-------------|---------|------|-------------|---------|------|
| C1          | S1      | 0.25 | C1          | S7      | 0.24 | C8          | S6      | 0.18 | C10         | S8      | 0.24 |
| C1          | S1      | 0.31 | C1          | S10     | 0.27 | C8          | S6      | 0.19 | C10         | S8      | 0.23 |
| C1          | S1      | 0.21 | C1          | S10     | 0.29 | C8          | S6      | 0.23 | C10         | S8      | 0.28 |
| C1          | S1      | 0.26 | C1          | S10     | 0.24 | C8          | S6      | 0.22 | C10         | S8      | 0.25 |
| C1          | S1      | 0.19 | C1          | S10     | 0.33 | C8          | S6      | 0.17 | C10         | S8      | 0.20 |
| C1          | S1      | 0.20 | C1          | S10     | 0.35 | C8          | S6      | 0.17 | C10         | S8      | 0.14 |
| C1          | S1      | 0.27 | C1          | S10     | 0.29 | C8          | S6      | 0.18 | C10         | S8      | 0.17 |
| C1          | S1      | 0.14 | C1          | S10     | 0.34 | C8          | S6      | 0.16 | C10         | S8      | 0.17 |
| C1          | S1      | 0.19 | C1          | S10     | 0.33 | C8          | S6      | 0.17 | C10         | S9      | 0.23 |
| C1          | S1      | 0.14 | C1          | S10     | 0.27 | C8          | S6      | 0.14 | C10         | S9      | 0.26 |
| C1          | S3      | 0.34 | C1          | S10     | 0.29 | C8          | S10     | 0.17 | C10         | S9      | 0.25 |
| C1          | S3      | 0.48 | C8          | S3      | 0.28 | C8          | S10     | 0.17 | C10         | S9      | 0.26 |
| C1          | S3      | 0.47 | C8          | S3      | 0.34 | C8          | S10     | 0.21 | C10         | S9      | 0.19 |
| C1          | S3      | 0.31 | C8          | S3      | 0.37 | C8          | S10     | 0.16 | C10         | S9      | 0.21 |
| C1          | S3      | 0.29 | C8          | S3      | 0.43 | C8          | S10     | 0.17 | C10         | S9      | 0.22 |
| C1          | S3      | 0.30 | C8          | S3      | 0.32 | C8          | S10     | 0.17 | C10         | S9      | 0.22 |
| C1          | S3      | 0.28 | C8          | S3      | 0.34 | C8          | S10     | 0.14 | C10         | S9      | 0.17 |
| C1          | S3      | 0.30 | C8          | S3      | 0.29 | C8          | S10     | 0.17 | C10         | S9      | 0.20 |
| C1          | S3      | 0.37 | C8          | S3      | 0.41 | C8          | S10     | 0.15 | C10         | S10     | 0.23 |
| C1          | S3      | 0.28 | C8          | S4      | 0.34 | C8          | S10     | 0.21 | C10         | S10     | 0.32 |
| C1          | S4      | 0.21 | C8          | S4      | 0.30 | C10         | S1      | 0.34 | C10         | S10     | 0.33 |
| C1          | S4      | 0.21 | C8          | S4      | 0.26 | C10         | S1      | 0.24 | C10         | S10     | 0.21 |
| C1          | S4      | 0.23 | C8          | S4      | 0.24 | C10         | S1      | 0.31 | C10         | S10     | 0.23 |
| C1          | S4      | 0.28 | C8          | S4      | 0.24 | C10         | S1      | 0.27 | C10         | S10     | 0.33 |
| C1          | S4      | 0.20 | C8          | S4      | 0.28 | C10         | S1      | 0.27 | C10         | S10     | 0.43 |
| C1          | S4      | 0.20 | C8          | S4      | 0.35 | C10         | S1      | 0.25 | C10         | S10     | 0.37 |
| C1          | S4      | 0.22 | C8          | S4      | 0.34 | C10         | S1      | 0.21 | C10         | S10     | 0.47 |
| C1          | S4      | 0.21 | C8          | S4      | 0.33 | C10         | S1      | 0.22 | C10         | S10     | 0.46 |
| C1          | S4      | 0.15 | C8          | S4      | 0.38 | C10         | S3      | 0.28 |             |         |      |
| C1          | S4      | 0.20 | C8          | S5      | 0.22 | C10         | S3      | 0.24 |             |         |      |
| C1          | S7      | 0.19 | C8          | S5      | 0.24 | C10         | S3      | 0.21 |             |         |      |
| C1          | S7      | 0.22 | C8          | S5      | 0.26 | C10         | S3      | 0.31 |             |         |      |
| C1          | S7      | 0.18 | C8          | S5      | 0.21 | C10         | S3      | 0.26 |             |         |      |
| C1          | S7      | 0.22 | C8          | S5      | 0.20 | C10         | S3      | 0.22 |             |         |      |
| C1          | S7      | 0.29 | C8          | S5      | 0.25 | C10         | S3      | 0.24 |             |         |      |
| C1          | S7      | 0.29 | C8          | S5      | 0.21 | C10         | S3      | 0.24 |             |         |      |
| C1          | S7      | 0.32 | C8          | S5      | 0.16 | C10         | S3      | 0.18 |             |         |      |
| C1          | S7      | 0.25 | C8          | S5      | 0.18 | C10         | S3      | 0.21 |             |         |      |
| C1          | S7      | 0.32 | C8          | S5      | 0.22 | C10         | S8      | 0.22 |             |         |      |

# Pits

| no.endocarp | no.cell | l.um | w.um | no.endocarp | no.cell | l.um | w.um | no.endocarp | no.cell | l.um | w.um |
|-------------|---------|------|------|-------------|---------|------|------|-------------|---------|------|------|
| C1          | S11     | 2.15 | 1.84 | C1          | S13     | 1.78 | 1.31 | C1          | S16     | 1.50 | 1.37 |
| C1          | S11     | 2.47 | 1.70 | C1          | S13     | 1.18 | 1.18 | C1          | S16     | 1.69 | 1.56 |
| C1          | S11     | 2.52 | 1.71 | C1          | S13     | 2.14 | 1.90 | C1          | S16     | 2.08 | 2.04 |
| C1          | S11     | 2.54 | 1.51 | C1          | S13     | 3.36 | 1.60 | C1          | S16     | 2.73 | 2.45 |
| C1          | S11     | 1.71 | 1.16 | C1          | S13     | 3.32 | 2.54 | C1          | S16     | 1.50 | 1.33 |
| C1          | S11     | 2.25 | 1.57 | C1          | S13     | 2.29 | 1.72 | C1          | S16     | 2.53 | 2.08 |
| C1          | S11     | 2.44 | 1.23 | C1          | S13     | 2.57 | 1.68 | C1          | S16     | 3.00 | 2.53 |
| C1          | S11     | 2.25 | 1.53 | C1          | S13     | 2.93 | 2.17 | C1          | S16     | 2.06 | 1.91 |
| C1          | S11     | 2.41 | 1.86 | C1          | S13     | 3.58 | 2.44 | C1          | S16     | 2.36 | 2.24 |
| C1          | S11     | 3.10 | 1.80 | C1          | S14     | 3.27 | 2.28 | C1          | S16     | 1.38 | 1.06 |
| C1          | S11     | 2.38 | 1.40 | C1          | S14     | 2.13 | 1.88 | C1          | S16     | 2.52 | 1.87 |
| C1          | S11     | 1.91 | 1.63 | C1          | S14     | 2.52 | 1.75 | C1          | S16     | 3.64 | 2.53 |
| C1          | S11     | 2.35 | 1.74 | C1          | S14     | 3.25 | 2.44 | C1          | S16     | 3.16 | 1.90 |
| C1          | S11     | 2.07 | 1.89 | C1          | S14     | 1.46 | 1.16 | C1          | S16     | 2.76 | 1.95 |
| C1          | S11     | 2.33 | 1.61 | C1          | S14     | 3.11 | 2.06 | C1          | S16     | 1.56 | 1.37 |
| C1          | S11     | 2.30 | 1.70 | C1          | S14     | 1.98 | 1.04 | C1          | S16     | 3.19 | 2.14 |
| C1          | S11     | 3.99 | 2.02 | C1          | S14     | 3.02 | 1.32 | C1          | S16     | 3.14 | 2.06 |
| C1          | S11     | 2.26 | 1.64 | C1          | S14     | 4.43 | 1.93 | C1          | S16     | 3.56 | 2.28 |
| C1          | S11     | 1.85 | 1.59 | C1          | S14     | 1.18 | 0.75 | C1          | S16     | 2.76 | 1.77 |
| C1          | S11     | 2.43 | 1.60 | C1          | S14     | 2.49 | 1.47 | C1          | S16     | 2.92 | 1.77 |
| C1          | S11     | 2.35 | 1.77 | C1          | S14     | 2.64 | 2.20 | C1          | S16     | 2.57 | 1.88 |
| C1          | S11     | 2.13 | 1.53 | C1          | S14     | 1.38 | 0.84 |             |         |      |      |
| C1          | S11     | 2.62 | 2.17 | C1          | S14     | 3.89 | 2.32 |             |         |      |      |
| C1          | S12     | 2.61 | 2.05 | C1          | S14     | 2.71 | 1.92 |             |         |      |      |
| C1          | S12     | 2.71 | 1.78 | C1          | S14     | 3.06 | 1.92 |             |         |      |      |
| C1          | S12     | 2.79 | 1.79 | C1          | S14     | 2.10 | 1.68 |             |         |      |      |
| C1          | S12     | 1.50 | 1.01 | C1          | S14     | 2.83 | 1.50 |             |         |      |      |
| C1          | S12     | 3.27 | 2.40 | C1          | S14     | 2.54 | 2.19 |             |         |      |      |
| C1          | S12     | 1.70 | 1.57 | C1          | S15     | 3.31 | 2.04 |             |         |      |      |
| C1          | S12     | 2.45 | 2.09 | C1          | S15     | 2.69 | 2.06 |             |         |      |      |
| C1          | S12     | 1.71 | 1.18 | C1          | S15     | 1.76 | 1.32 |             |         |      |      |
| C1          | S12     | 1.97 | 1.43 | C1          | S15     | 3.68 | 2.40 |             |         |      |      |
| C1          | S12     | 2.37 | 1.88 | C1          | S15     | 2.20 | 2.14 |             |         |      |      |
| C1          | S12     | 2.21 | 1.77 | C1          | S15     | 1.77 | 1.53 |             |         |      |      |
| C1          | S12     | 3.00 | 1.94 | C1          | S15     | 2.51 | 2.10 |             |         |      |      |
| C1          | S12     | 3.10 | 2.17 | C1          | S15     | 3.04 | 2.25 |             |         |      |      |
| C1          | S12     | 1.94 | 1.77 | C1          | S15     | 2.73 | 1.90 |             |         |      |      |
| C1          | S12     | 1.93 | 1.30 | C1          | S15     | 2.61 | 1.77 |             |         |      |      |
| C1          | S12     | 2.07 | 1.92 | C1          | S15     | 3.53 | 2.81 |             |         |      |      |
| C1          | S12     | 2.50 | 1.70 | C1          | S15     | 3.77 | 2.04 |             |         |      |      |
| C1          | S12     | 2.48 | 1.77 | C1          | S15     | 2.41 | 1.76 |             |         |      |      |
| C1          | S12     | 2.37 | 1.99 | C1          | S15     | 2.43 | 2.19 |             |         |      |      |
| C1          | S12     | 3.11 | 2.18 | C1          | S15     | 2.57 | 2.20 |             |         |      |      |
| C1          | S12     | 2.87 | 2.04 | C1          | S15     | 2.75 | 1.62 |             |         |      |      |
| C1          | S13     | 2.09 | 1.89 | C1          | S15     | 3.93 | 2.31 |             |         |      |      |
| C1          | S13     | 1.81 | 1.68 | C1          | S15     | 3.45 | 2.09 |             |         |      |      |
| C1          | S13     | 1.92 | 1.45 | C1          | S15     | 3.08 | 1.76 |             |         |      |      |
| C1          | S13     | 1.81 | 1.41 | C1          | S15     | 2.19 | 1.55 |             |         |      |      |
| C1          | S13     | 2.14 | 1.76 | C1          | S15     | 3.12 | 1.61 |             |         |      |      |
| C1          | S13     | 1.78 | 1.36 | C1          | S15     | 2.48 | 1.84 |             |         |      |      |
| C1          | S13     | 2.40 | 2.00 | C1          | S15     | 2.18 | 1.76 |             |         |      |      |
| C1          | S13     | 2.09 | 1.42 | C1          | S15     | 2.44 | 1.91 |             |         |      |      |
| C1          | S13     | 2.48 | 1.74 | C1          | S15     | 3.21 | 1.97 |             |         |      |      |

| no.endocarp | no.cell | lum  | w.um | no.endocarp | no.cell | lum  | w.um | no.endocarp | no.cell | lum  | w.um |
|-------------|---------|------|------|-------------|---------|------|------|-------------|---------|------|------|
| C8          | S11     | 3.07 | 2.55 | C8          | S13     | 2.68 | 1.79 | C8          | S15     | 1.51 | 1.28 |
| C8          | S11     | 2.02 | 1.80 | C8          | S13     | 2.40 | 1.45 | C8          | S15     | 2.47 | 2.03 |
| C8          | S11     | 2.22 | 1.92 | C8          | S13     | 3.35 | 1.95 | C8          | S15     | 2.56 | 1.92 |
| C8          | S11     | 2.74 | 2.01 | C8          | S13     | 1.96 | 1.34 | C8          | S15     | 2.12 | 1.75 |
| C8          | S11     | 1.77 | 1.36 | C8          | S13     | 2.60 | 2.03 | C8          | S15     | 2.25 | 2.00 |
| C8          | S11     | 2.21 | 1.74 | C8          | S13     | 2.09 | 1.80 | C8          | S15     | 2.33 | 1.72 |
| C8          | S11     | 2.52 | 1.78 | C8          | S13     | 1.54 | 1.31 | C8          | S15     | 2.69 | 1.99 |
| C8          | S11     | 2.70 | 2.02 | C8          | S13     | 1.71 | 1.67 | C8          | S15     | 1.42 | 1.07 |
| C8          | S11     | 1.88 | 1.51 | C8          | S13     | 1.83 | 1.59 | C8          | S15     | 2.78 | 1.76 |
| C8          | S11     | 1.72 | 1.68 | C8          | S13     | 3.08 | 1.80 | C8          | S15     | 2.76 | 1.65 |
| C8          | S11     | 2.34 | 1.84 | C8          | S13     | 3.58 | 2.55 | C8          | S15     | 2.07 | 1.22 |
| C8          | S11     | 3.29 | 2.15 | C8          | S13     | 2.95 | 1.93 | C8          | S15     | 2.31 | 2.19 |
| C8          | S11     | 2.70 | 2.33 | C8          | S14     | 1.68 | 1.43 | C8          | S15     | 2.46 | 1.72 |
| C8          | S11     | 2.85 | 2.50 | C8          | S14     | 3.87 | 2.54 | C8          | S15     | 2.21 | 1.85 |
| C8          | S11     | 2.56 | 1.91 | C8          | S14     | 2.29 | 1.94 | C8          | S15     | 1.92 | 1.30 |
| C8          | S11     | 1.94 | 1.64 | C8          | S14     | 2.12 | 1.73 | C8          | S15     | 2.47 | 1.54 |
| C8          | S11     | 2.60 | 1.90 | C8          | S14     | 1.35 | 1.27 | C8          | S16     | 2.20 | 1.72 |
| C8          | S11     | 2.86 | 2.54 | C8          | S14     | 1.65 | 1.39 | C8          | S16     | 2.79 | 2.44 |
| C8          | S11     | 3.53 | 2.95 | C8          | S14     | 2.06 | 1.61 | C8          | S16     | 3.60 | 2.71 |
| C8          | S11     | 2.67 | 1.98 | C8          | S14     | 1.90 | 1.67 | C8          | S16     | 2.43 | 1.97 |
| C8          | S11     | 2.74 | 2.42 | C8          | S14     | 2.72 | 1.89 | C8          | S16     | 2.43 | 1.76 |
| C8          | S11     | 1.88 | 1.46 | C8          | S14     | 2.21 | 1.45 | C8          | S16     | 2.13 | 1.95 |
| C8          | S11     | 2.56 | 1.79 | C8          | S14     | 1.87 | 1.03 | C8          | S16     | 1.92 | 1.47 |
| C8          | S11     | 2.85 | 2.00 | C8          | S14     | 2.01 | 1.77 | C8          | S16     | 2.63 | 1.82 |
| C8          | S11     | 2.98 | 2.02 | C8          | S14     | 2.80 | 2.37 | C8          | S16     | 1.29 | 0.84 |
| C8          | S11     | 1.99 | 1.43 | C8          | S14     | 2.27 | 1.87 | C8          | S16     | 1.85 | 1.40 |
| C8          | S11     | 2.16 | 1.66 | C8          | S14     | 2.18 | 2.00 | C8          | S16     | 2.42 | 1.66 |
| C8          | S11     | 2.08 | 1.84 | C8          | S14     | 4.24 | 2.18 | C8          | S16     | 2.04 | 1.62 |
| C8          | S11     | 2.08 | 1.68 | C8          | S14     | 2.13 | 1.47 | C8          | S16     | 2.82 | 1.92 |
| C8          | S11     | 2.49 | 1.82 | C8          | S14     | 2.11 | 1.54 |             |         |      |      |
| C8          | S11     | 2.82 | 2.35 | C8          | S14     | 3.40 | 1.64 |             |         |      |      |
| C8          | S11     | 2.32 | 2.17 | C8          | S14     | 2.44 | 1.74 |             |         |      |      |
| C8          | S11     | 3.04 | 2.16 | C8          | S14     | 2.47 | 1.58 |             |         |      |      |
| C8          | S11     | 2.47 | 2.28 | C8          | S14     | 2.48 | 1.78 |             |         |      |      |
| C8          | S11     | 4.04 | 2.89 | C8          | S14     | 2.39 | 2.24 |             |         |      |      |
| C8          | S11     | 2.74 | 2.68 | C8          | S14     | 2.05 | 1.83 |             |         |      |      |
| C8          | S11     | 3.09 | 2.64 | C8          | S14     | 1.22 | 0.98 |             |         |      |      |
| C8          | S12     | 1.77 | 1.38 | C8          | S14     | 2.73 | 2.09 |             |         |      |      |
| C8          | S12     | 2.10 | 1.77 | C8          | S14     | 2.29 | 1.35 |             |         |      |      |
| C8          | S12     | 1.91 | 1.47 | C8          | S14     | 2.42 | 1.77 |             |         |      |      |
| C8          | S12     | 2.41 | 1.80 | C8          | S14     | 2.63 | 2.13 |             |         |      |      |
| C8          | S12     | 2.56 | 1.87 | C8          | S14     | 2.46 | 1.98 |             |         |      |      |
| C8          | S12     | 2.27 | 1.65 | C8          | S14     | 2.45 | 1.51 |             |         |      |      |
| C8          | S12     | 1.92 | 1.63 | C8          | S14     | 2.48 | 1.88 |             |         |      |      |
| C8          | S12     | 2.02 | 1.45 | C8          | S14     | 2.74 | 2.31 |             |         |      |      |
| C8          | S12     | 2.90 | 2.16 | C8          | S14     | 2.44 | 2.01 |             |         |      |      |
| C8          | S12     | 1.81 | 1.69 | C8          | S14     | 2.47 | 2.25 |             |         |      |      |
| C8          | S12     | 2.32 | 2.11 | C8          | S14     | 3.00 | 2.19 |             |         |      |      |
| C8          | S12     | 1.70 | 1.62 | C8          | S14     | 3.24 | 2.78 |             |         |      |      |
| C8          | S12     | 2.67 | 1.81 | C8          | S14     | 1.95 | 1.46 |             |         |      |      |
| C8          | S12     | 2.47 | 1.88 | C8          | S14     | 3.42 | 2.35 |             |         |      |      |
| C8          | S12     | 2.95 | 1.78 | C8          | S15     | 2.40 | 1.70 |             |         |      |      |
| C8          | S12     | 3.30 | 1.75 | C8          | S15     | 1.36 | 1.29 |             |         |      |      |
| C8          | S13     | 2.33 | 1.75 | C8          | S15     | 1.25 | 0.96 |             |         |      |      |



| no.endocarp | no.cell | lum  | w.um | no.endocarp | no.cell | lum  | w.um | no.endocarp | no.cell | lum  | w.um |
|-------------|---------|------|------|-------------|---------|------|------|-------------|---------|------|------|
| C10         | S11     | 1.68 | 1.45 | C10         | S13     | 1.81 | 1.25 | C10         | S15     | 2.24 | 1.00 |
| C10         | S11     | 2.53 | 1.79 | C10         | S13     | 1.80 | 1.44 | C10         | S15     | 2.56 | 1.47 |
| C10         | S11     | 2.13 | 1.63 | C10         | S13     | 1.31 | 1.05 | C10         | S15     | 2.81 | 1.67 |
| C10         | S11     | 2.79 | 1.77 | C10         | S13     | 1.94 | 1.68 | C10         | S15     | 1.95 | 1.37 |
| C10         | S11     | 1.45 | 1.17 | C10         | S13     | 2.19 | 2.05 | C10         | S15     | 2.02 | 1.66 |
| C10         | S11     | 2.48 | 1.99 | C10         | S13     | 2.16 | 2.11 | C10         | S15     | 2.54 | 1.43 |
| C10         | S11     | 1.60 | 1.38 | C10         | S14     | 2.47 | 1.92 | C10         | S15     | 2.45 | 1.43 |
| C10         | S11     | 2.67 | 1.95 | C10         | S14     | 2.50 | 1.52 | C10         | S15     | 2.97 | 1.57 |
| C10         | S11     | 3.60 | 2.15 | C10         | S14     | 2.52 | 1.40 | C10         | S15     | 2.81 | 1.67 |
| C10         | S11     | 2.23 | 2.12 | C10         | S14     | 2.77 | 1.35 | C10         | S15     | 2.91 | 1.33 |
| C10         | S11     | 3.06 | 2.73 | C10         | S14     | 3.04 | 1.62 | C10         | S15     | 2.16 | 1.59 |
| C10         | S11     | 2.96 | 2.33 | C10         | S14     | 2.35 | 1.46 | C10         | S15     | 2.59 | 0.98 |
| C10         | S11     | 3.78 | 2.06 | C10         | S14     | 5.02 | 1.76 | C10         | S15     | 3.59 | 1.84 |
| C10         | S11     | 3.11 | 2.12 | C10         | S14     | 5.17 | 2.04 | C10         | S15     | 1.65 | 1.06 |
| C10         | S11     | 3.38 | 2.26 | C10         | S14     | 2.07 | 1.09 | C10         | S15     | 1.98 | 1.34 |
| C10         | S11     | 2.70 | 2.00 | C10         | S14     | 1.84 | 1.09 | C10         | S16     | 3.89 | 2.17 |
| C10         | S11     | 1.95 | 1.63 | C10         | S14     | 2.98 | 1.46 | C10         | S16     | 3.09 | 2.07 |
| C10         | S11     | 2.13 | 1.88 | C10         | S14     | 3.22 | 1.78 | C10         | S16     | 2.90 | 2.06 |
| C10         | S11     | 1.84 | 1.75 | C10         | S14     | 1.92 | 1.14 | C10         | S16     | 2.14 | 1.74 |
| C10         | S11     | 4.14 | 2.10 | C10         | S14     | 3.45 | 2.06 | C10         | S16     | 2.56 | 2.10 |
| C10         | S11     | 2.59 | 2.54 | C10         | S14     | 2.61 | 1.75 | C10         | S16     | 2.94 | 2.51 |
| C10         | S11     | 2.27 | 1.99 | C10         | S14     | 2.73 | 1.45 | C10         | S16     | 2.95 | 2.16 |
| C10         | S12     | 2.51 | 2.49 | C10         | S14     | 2.05 | 1.60 | C10         | S16     | 2.21 | 2.03 |
| C10         | S12     | 2.11 | 2.04 | C10         | S14     | 2.42 | 1.36 | C10         | S16     | 2.46 | 1.57 |
| C10         | S12     | 2.19 | 1.58 | C10         | S14     | 1.97 | 1.19 | C10         | S16     | 2.69 | 1.87 |
| C10         | S12     | 2.35 | 2.05 | C10         | S14     | 2.25 | 1.50 | C10         | S16     | 3.16 | 2.27 |
| C10         | S12     | 2.35 | 1.71 | C10         | S14     | 1.69 | 1.34 | C10         | S16     | 3.08 | 2.74 |
| C10         | S12     | 3.06 | 1.68 | C10         | S14     | 3.09 | 1.84 | C10         | S16     | 1.15 | 1.10 |
| C10         | S12     | 3.26 | 1.86 | C10         | S14     | 2.46 | 1.20 | C10         | S16     | 4.15 | 2.46 |
| C10         | S12     | 2.44 | 1.96 | C10         | S14     | 1.79 | 1.10 | C10         | S16     | 2.06 | 1.41 |
| C10         | S12     | 3.15 | 2.02 | C10         | S14     | 2.05 | 1.61 | C10         | S16     | 1.82 | 1.23 |
| C10         | S12     | 2.10 | 1.75 | C10         | S14     | 2.13 | 1.41 | C10         | S16     | 3.30 | 2.08 |
| C10         | S12     | 2.50 | 1.90 | C10         | S14     | 1.88 | 1.52 | C10         | S16     | 3.03 | 2.02 |
| C10         | S12     | 2.65 | 1.82 | C10         | S14     | 3.06 | 1.63 | C10         | S16     | 2.08 | 1.67 |
| C10         | S12     | 2.66 | 2.42 | C10         | S14     | 2.56 | 1.42 | C10         | S16     | 2.23 | 1.83 |
| C10         | S12     | 2.92 | 1.44 | C10         | S14     | 1.99 | 1.83 | C10         | S16     | 3.01 | 1.93 |
| C10         | S12     | 2.04 | 1.88 | C10         | S14     | 1.77 | 1.20 | C10         | S16     | 3.22 | 2.18 |
| C10         | S12     | 1.79 | 1.60 | C10         | S14     | 1.63 | 1.28 | C10         | S16     | 1.71 | 1.33 |
| C10         | S12     | 2.83 | 2.15 | C10         | S14     | 2.27 | 1.28 | C10         | S16     | 3.67 | 2.67 |
| C10         | S12     | 1.89 | 1.62 | C10         | S14     | 2.96 | 1.85 | C10         | S16     | 2.64 | 1.57 |
| C10         | S12     | 1.89 | 1.70 | C10         | S14     | 1.84 | 1.54 |             |         |      |      |
| C10         | S12     | 3.38 | 1.80 | C10         | S15     | 2.75 | 1.87 |             |         |      |      |
| C10         | S12     | 2.73 | 2.09 | C10         | S15     | 2.78 | 1.50 |             |         |      |      |
| C10         | S12     | 2.78 | 1.93 | C10         | S15     | 2.24 | 1.65 |             |         |      |      |
| C10         | S12     | 2.67 | 1.93 | C10         | S15     | 2.19 | 1.92 |             |         |      |      |
| C10         | S12     | 2.30 | 1.68 | C10         | S15     | 2.50 | 1.58 |             |         |      |      |
| C10         | S13     | 1.59 | 1.29 | C10         | S15     | 2.60 | 1.56 |             |         |      |      |
| C10         | S13     | 2.26 | 1.83 | C10         | S15     | 2.18 | 1.43 |             |         |      |      |
| C10         | S13     | 2.35 | 1.67 | C10         | S15     | 1.78 | 1.44 |             |         |      |      |
| C10         | S13     | 2.45 | 1.78 | C10         | S15     | 2.50 | 1.10 |             |         |      |      |
| C10         | S13     | 1.96 | 1.54 | C10         | S15     | 1.63 | 1.19 |             |         |      |      |
| C10         | S13     | 2.40 | 1.83 | C10         | S15     | 2.18 | 1.22 |             |         |      |      |
| C10         | S13     | 2.43 | 1.54 | C10         | S15     | 2.18 | 1.59 |             |         |      |      |
| C10         | S13     | 1.51 | 1.23 | C10         | S15     | 2.39 | 1.27 |             |         |      |      |
| C10         | S13     | 2.69 | 2.10 | C10         | S15     | 2.56 | 1.56 |             |         |      |      |
